# Supplementary material for: Mesenchymal Stem Cells for Neurological Disorders
Source: PubMed Central journal article supplement (PMC8024997; doi:10.1002/advs.202002944), 2021-02-24
Supplement: ADVS-8-2002944-s003.pdf [file ADVS-8-2002944-s003.pdf]

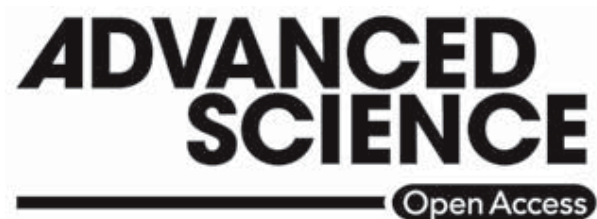

## Supporting Information

for *Adv. Sci.*, DOI: 10.1002/advs.202002944

Mesenchymal Stem Cells for Neurological Disorders

*Anna Andrzejewska, Sylwia Dabrowska, Barbara Lukomska, and Mirosław Janowski\**
